# Supplementary material
Source: Springer Nature journal article supplement (https://www.springermedizin.de/resource/supplementary/12893_2008_118_MOESM3_ESM.pdf/9512980)

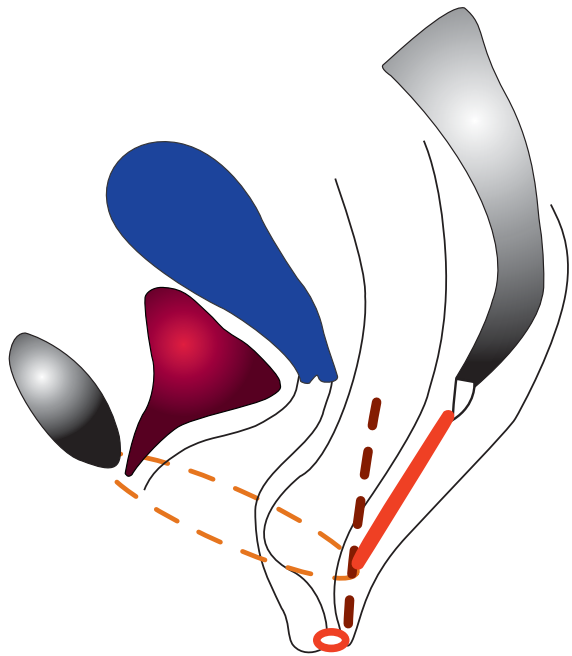

**A**

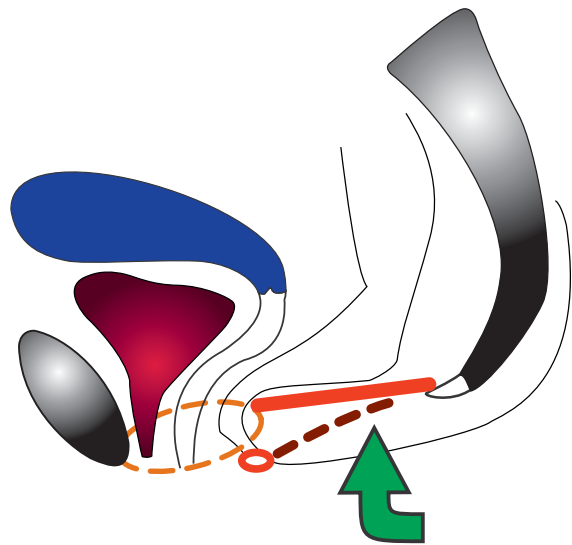

**B**

Supplement: MOESM3 [file 9512980]
